# Supplementary material
Source: PubMed Central journal article supplement (PMC6879231)
Supplement: AAC.01609-19-s0001.pdf [file AAC.01609-19-s0001.pdf]

## SUPPLEMENTAL MATERIALS

**Table S1. Characteristics of the clinical isolates used in this study**

| Strain        | MLST <sup>a</sup> | Enzyme type <sup>b</sup> | Year of isolation | Source <sup>c</sup> | ΦNJS1 sensitivity <sup>d</sup> |
|---------------|-------------------|--------------------------|-------------------|---------------------|--------------------------------|
| A2312NM       | ST-11             | KPC-2                    | 2014              | Feces               | +++                            |
| A1678         | ND                | KPC-2                    | 2013              | LRS                 | -                              |
| A1679         | ST-11             | KPC-2                    | 2013              | LRS                 | -                              |
| A1705         | ST-449            | KPC-2, NDM-1             | 2013              | Urine               | -                              |
| A1706         | ST-449            | KPC-2, NDM-1             | 2013              | LRS                 | -                              |
| A1763         | ST-11             | KPC-2                    | 2013              | Feces               | -                              |
| A1806         | ST-1493           | NDM-1                    | 2013              | Feces               | +++                            |
| A1831         | ST-11             | KPC-2                    | 2014              | Feces               | -                              |
| A1836         | ST-11             | KPC-2                    | 2014              | Feces               | ++                             |
| A2314         | ST-11             | KPC-2                    | 2014              | LRS                 | +++                            |
| A2402         | NEW               | KPC-2                    | 2014              | Feces               | +++                            |
| A2440         | ND                | NDM-1                    | 2014              | Blood               | -                              |
| A1876         | ST-1318           | NDM-1                    | 2014              | Feces               | -                              |
| A1838         | ST-17             | IMP                      | 2014              | Feces               | +++                            |
| A1682         | ST-17             | ND                       | 2013              | Blood               | ++                             |
| A2359         | ST-307            | IMP                      | 2014              | LRS                 | -                              |
| A2368         | ST-307            | IMP                      | 2014              | LRS                 | -                              |
| A1871         | ST-37             | ND                       | 2014              | Urine               | ++                             |
| A2612         | ST-395            | KPC                      | 2015              | Feces               | +++                            |
| A1851         | ST-395            | ND                       | 2014              | Feces               | -                              |
| A1824         | ST-65             | KPC-2                    | 2014              | Feces               | +++                            |
| A1749         | ST-709            | ND                       | 2013              | Feces               | -                              |
| A1860         | ST-846            | IMP                      | 2014              | Blood               | ++                             |
| A1683         | ST-86             | ND                       | 2013              | Blood               | -                              |
| A2366         | ST-875            | ND                       | 2014              | Feces               | -                              |
| A2369         | NEW               | IMP                      | 2014              | AF                  | -                              |
| A2373         | NEW               | KPC                      | 2014              | LRS                 | +++                            |
| A2371         | NEW               | KPC                      | 2014              | LRS                 | -                              |
| KP1513        | ND                | ND                       | 2015              | LRS                 | +++                            |
| ATCC BAA-1899 |                   | KPC, NDM                 | unknown           | Human               | ++                             |
| ATCC BAA1705  |                   | ND                       | 2007              | Urine               | -                              |
| ATCC BAA1706  |                   | ND                       | 2007              | Urine               | +++                            |

<sup>a</sup>MLST type: NEW, new ST types; ND, not determined; <sup>b</sup>Carbapenem antibiotic enzyme type: KPC, carbapenemases; NDM, New Delhi metallo-β-lactamase; IMP, imipenemase metallo-β-lactamase; ND, not determined. <sup>c</sup>Clinical specimens source: AF, ascitic fluid; LRS, lower respiratory secretions; <sup>d</sup>Sensitivity to ΦNJS1: “+++”, EOP (Efficiency of Plaques) >0.01, “++”, EOP>0.0001, “-” EOP<10<sup>-5</sup>.

**Table S2. *Kp* phages isolated in this study**

| phage  | Genbank number | Genome (bps) | GC content | Host range <sup>a</sup> |
|--------|----------------|--------------|------------|-------------------------|
| ΦNJS1  | MH445453       | 49,292       | 50.6%      | 46.88%                  |
| ΦNJS2  | MH633485       | 50,132       | 50.8%      | 25%                     |
| ΦNJS3  | MH633486       | 49,387       | 51.1%      | 21.88%                  |
| ΦNJR15 | MH633487       | 49,468       | 51.0%      | 21.88%                  |
| ΦTAH8  | MH633484       | 49,344       | 51.1%      | 31.25%                  |

<sup>a</sup>. 32 *Kp* clinical isolates were tested. EOP >10<sup>-5</sup> indicates susceptibility to phage.

**Table S3. Primers used in this study**

| Primer              | Sequence                                                                              |
|---------------------|---------------------------------------------------------------------------------------|
| mcr1_IS_LR<br>ed_u1 | 5' GTAACCGTCTCATTAAACCGTCTTTCGCCTCCCTTTCCTGTTT<br>CCGATACCGTTGCACTTGGTTTGACAATTC 3'   |
| mcr1_IS_LR<br>ed_l1 | 5' CTTGAAAATACATGGTATTGCGTAAAGGGCGGTAAAAGTCTA<br>TCCTGGTGTGTGCGGTGGGTTTGGAAAAAATAC 3' |
| mcr1_LRed<br>_u1    | 5'<br>GCAGTATAATTGCCGTAATTATCCCACCGTTTATTTTTTGAGTAG<br>TTTCTCGTGTAGGCTGGAGCTGCTTC 3'  |
| mcr1_LRed<br>_l1    | 5'<br>GACAAGAGCGATACTCATCTCAGCAAGTAGGCGTTTATTTGATA<br>AATACGCATATGAATATCCTCCTTAG 3'   |
| oriR6kseqpri<br>m1  | 5' GACACAGGAACACTTAACGGC 3'                                                           |
| psyn-u1             | 5' CCTGACGGATGGCCTTTTTG 3'                                                            |

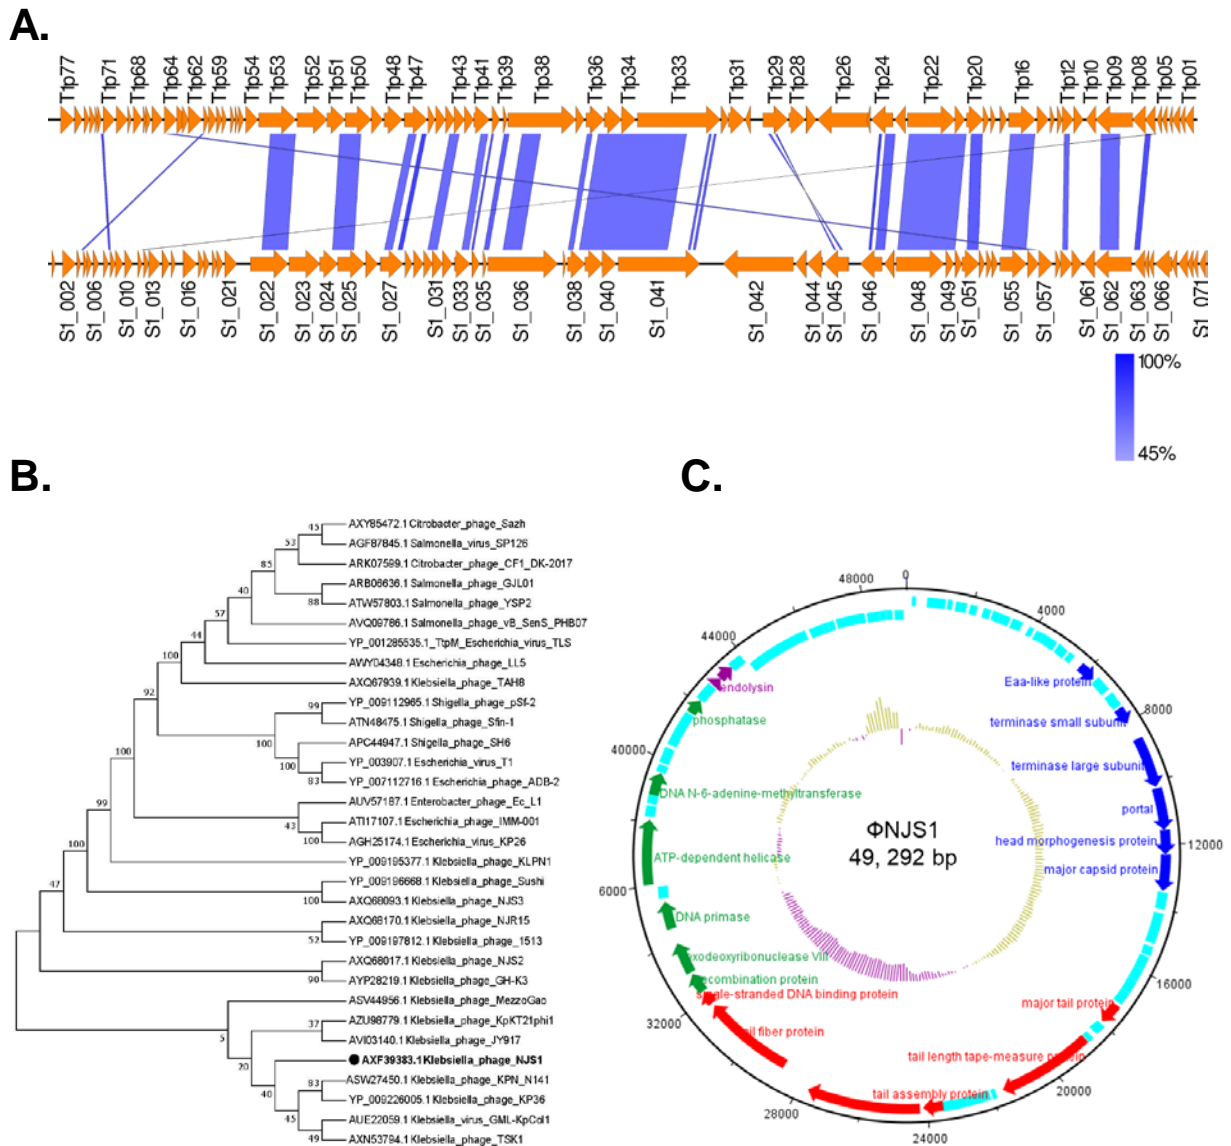

**Fig. S1.** Genome map and comparison of  $\Phi$ NJS1 with other phages. **A.** Direct comparison of the genomic structures of NJS1 (accession no. MH445453) and close-related Enterobacteria phage T1 genome (NC\_005833) by GATU software, RAST and PHASTER programs. Shaded boxes represent the sequence identity levels between these two genomes. **B.** Phylogenetic tree based on the tape measure proteins (TMP) by using the Neighbor-Joining method. **C.** Genome map. The inner circle indicates the GC content. The color of each gene refers to the functional category: phage structure (blue and red), replication/recombination/repair (green), lysis (purple). The scale units are base pairs.

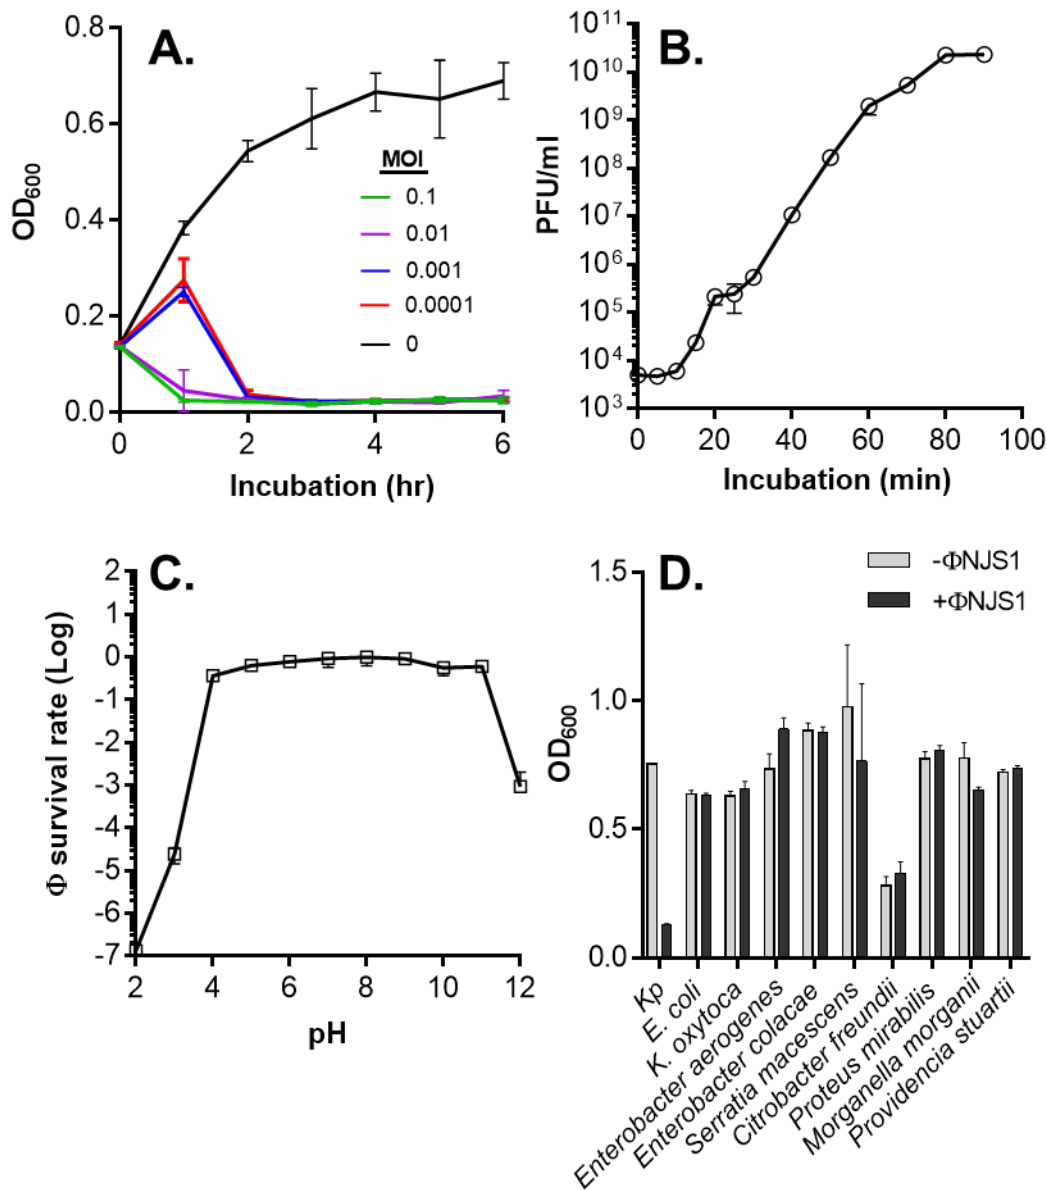

**Fig. S2.** The characteristics of  $\Phi$ NJS1. **A.** Infectious dose. Approximately  $10^8$  CFU/ml mid-log *Kp* cells were incubated with the phage at a multiplicity of infection (MOI) of 0.0001, 0.001, 0.01, or 0.1. Phage infection dynamics (OD<sub>600</sub>) was measured at 1 hr intervals for 6 hr standing incubation at 37°C. The mean of 3 independent assays is shown and error bars represent the standard deviation. **B.** One-step growth curve of the  $\Phi$ NJS1 with *Kp*. Approximately  $3 \times 10^8$  CFU/ml mid-log *Kp* cells were incubated with the phage at a MOI of 0.0001. After 10 mins of phage adsorption, unadsorbed phages were removed by centrifugation and bacterial cells were resuspended in fresh LB and incubated at 37°C under constant shaking. Samples were taken at 5-min intervals for titration immediately. The mean of 3 independent assays is shown, and error bars represent the standard deviation. **C.** Phage stability in different pHs.  $10^8$  PFU/mL phage

particles were incubated in 0.8% NaCl buffered to different pH for 24 hr at 37°C. The survival rate of the phage was compared to that of the control samples (4°C, pH 7). The mean of 3 independent assays is shown and error bars represent the standard deviation. D. Host range specificity. All *Enterobacteriaceae* strains were cocultured without or with phage at MOI=1 under shaking condition at 37°C. At the 6-hr time point, OD<sub>600</sub> was measured.

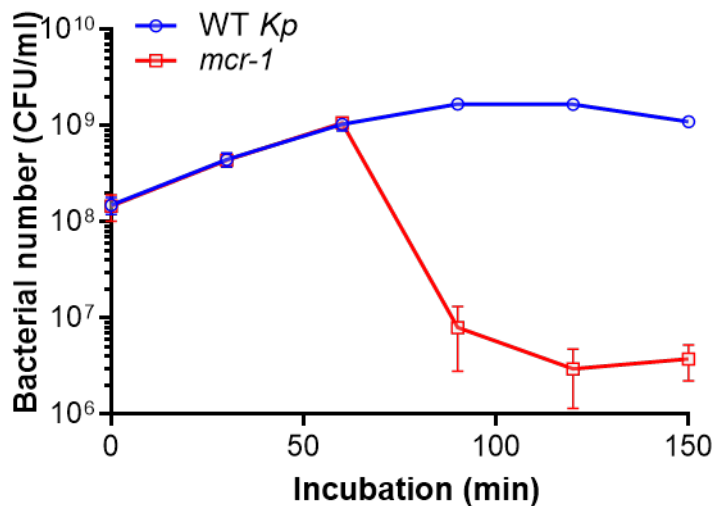

**Fig. S3.** *Kp* CFU during phage infection.  $2 \times 10^8$  CFU/ml WT *Kp* and *Kp* (*mcr-1*) were mixed with  $\Phi$ NJS1 at MOI=10<sup>-4</sup> and incubated at 37°C. Viable bacteria were then counted by serial dilution and plating on LB agar. The mean of three independent assays is shown and error bars represent the standard deviation.

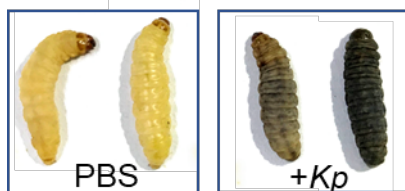

**Fig. S4.** *G. mellonella* responses to *Kp* infection. Larvae were injected with 10  $\mu$ l of *Kp* cells ( $10^6$  CFU) or PBS in parallel. Infected larva became pigmented progressively darker over the course of the infection. Photography was taken after 24 hrs of infection.
